# Supplementary material for: Efficacy and Tolerability of a Fixed-Dose Combination of Rosuvastatin and Ezetimibe Compared with a Fixed-Dose Combination of Simvastatin and Ezetimibe in Brazilian Patients with Primary Hypercholesterolemia or Mixed Dyslipidemia: A Multicenter, Randomized Trial
Source: PubMed Central journal article supplement — Curr Ther Res Clin Exp. 2020 Jul 28;93:100595. doi: 10.1016/j.curtheres.2020.100595 (PMC7451794; doi:10.1016/j.curtheres.2020.100595), 2020-07-28
Supplement: mmc1.pdf [file mmc1.pdf]

# **LABORATORY PROCEDURES CENTRAL LABORATORY GC-2**

---

## **LANCE STUDY PROTOCOL ACH-TRZ-03**

## GC-2 MONITORING

**Maisa Kiffer**

**Tamara Gagliardi**

[maisa.kiffer@gcdois.com.br](mailto:maisa.kiffer@gcdois.com.br)

[tamara.gagliardi@gcdois.com.br](mailto:tamara.gagliardi@gcdois.com.br)

**Phone: (11) 3528-7406 - extensions No. 6919 / 6921**

**Fax: (11) 3528-7404**

**Opening Hours: Monday to Friday 8:30 AM - 6:00 PM**

**SUPPORT: questions about kits, queries, logistical matters, exams and results release**

# GENERAL INFORMATION ON VISITS WITH LABORATORY EXAMS

| VISITS | Study Stage           |
|--------|-----------------------|
| V-3    | Screening Visit       |
| V-1    | Standardization Visit |
| V1     | Treatment Visit       |
| V3     | Treatment Visit       |

**SAMPLES SUBMISSION CONDITION on visits V-3, V-1, V1 and V3:  
REFRIGERATED and FROZEN**

# EXAMS BY VISIT

| EXAMS                              | V-3 | V-1 | V1 | V3 |
|------------------------------------|-----|-----|----|----|
| COMPLETE BLOOD COUNT AND PLATELETS | ✓   | ✓   | ✓  | ✓  |
| COAGULOGRAM (TP/TTPA)              | ✓   | ✓   | ✓  | ✓  |
| SODIUM                             | ✓   | ✓   | ✓  | ✓  |
| POTASSIUM                          | ✓   | ✓   | ✓  | ✓  |
| SGOT                               | ✓   | ✓   | ✓  | ✓  |
| SGTP                               | ✓   | ✓   | ✓  | ✓  |
| ALKALINE PHOSPHATASE               | ✓   | ✓   | ✓  | ✓  |
| TOTAL BILIRUBIN AND FRACTIONS      | ✓   | ✓   | ✓  | ✓  |
| CREATININE                         | ✓   | ✓   | ✓  | ✓  |
| UREA                               | ✓   | ✓   | ✓  | ✓  |
| TOTAL PROTEINS AND FRACTIONS       | ✓   | ✓   | ✓  | ✓  |
| CPK                                | ✓   | ✓   | ✓  | ✓  |
| CPK MB                             | ✓   | ✓   | ✓  | ✓  |
| PCR                                | ✓   | ✓   | ✓  | ✓  |
| APOLIPOPROTEIN B                   | ✓   | ✓   | ✓  | ✓  |
| GLUCOSE                            | ✓   | ✓   | ✓  | ✓  |
| HB1AC                              | ✓   | NA  | NA | NA |
| TOTAL CHOLESTEROL AND FRACTIONS    | ✓   | ✓   | ✓  | ✓  |
| TRIGLYCERIDES                      | ✓   | ✓   | ✓  | ✓  |
| TSH                                | ✓   | NA  | NA | NA |
| TYPE 1 URINE                       | ✓   | NA  | NA | ✓  |
| SERIAL BETA-HCG*                   | ✓   | ✓   | ✓  | ✓  |

# INSTRUCTIONS TO SUBJECTS AND GENERAL OBSERVATIONS

\* **WE RECOMMEND 12-HOUR FASTING** in order to meet the recommended interval to perform the lipid panel.

| EXAMS                                                                   | INSTRUCTIONS TO RESEARCH SUBJECTS | ADDITIONAL GUIDELINES                                                         |
|-------------------------------------------------------------------------|-----------------------------------|-------------------------------------------------------------------------------|
| <b>BIOCHEMICAL PANEL, GLUCOSE</b>                                       | <b>08 hour fast</b>               | Avoid physical exertion before collection                                     |
| <b>TOTAL CHOLESTEROL AND FRACTIONS, TRIGLYCERIDES, APOLIPOPROTEIN B</b> | <b>12 hour fast</b>               | Maintain your usual diet for at least 5 days                                  |
| <b>COAGULOGRAM</b>                                                      | <b>02 hour fast</b>               | Inform if you use medications, especially oral anticoagulants                 |
| <b>TSH, CPK</b>                                                         | <b>03 hour fast</b>               | Do not practice intense physical activity in the three days prior to the exam |
| <b>COMPLETE BLOOD COUNT AND PLATELETS</b>                               | <b>04 hour fast</b>               | Collection is not recommended after heavy physical activity.                  |

# KIT SÃO PAULO COMPOSITION

| Visits | Type Kit | Composition                    | Qty            | Item                                                                                  |
|--------|----------|--------------------------------|----------------|---------------------------------------------------------------------------------------|
| V-3 V3 | Kit A    | 3.5 mL tube with EDTA          | 1              |    |
|        |          | 3.5 mL tube with Separator Gel | 4              |    |
|        |          | 3.5 mL tube with Citrate       | 1              |    |
|        |          | Needle vacuum (25 x 8 mm)      | 1              |    |
|        |          | Holder and Blood Stop          | 1 / each       |    |
|        |          | Transfer tube                  | 1              |    |
|        |          | 80 mL Urine Vial               | 1              |    |
|        |          | 10 mL Conical Tube for Urine   | 1              |  |
|        |          | Pasteur Pipette                | 2              |  |
|        |          | Zip Bag                        | 2              |  |
|        |          | Identification Tags            | 2              |  |
|        |          | Exam Request Form              | 2 counterparts | See page 13                                                                           |

# KIT SÃO PAULO COMPOSITION

| Visits    | Type Kit | Composition                    | Qty            | Item                                                                                  |
|-----------|----------|--------------------------------|----------------|---------------------------------------------------------------------------------------|
| V-1<br>V1 | Kit B    | 3.5 mL tube with EDTA          | 1              |    |
|           |          | 3.5 mL tube with Separator Gel | 4              |    |
|           |          | 3.5 mL tube with Citrate       | 1              |    |
|           |          | Needle vacuum (25 x 8 mm)      | 1              |    |
|           |          | Holder and Blood Stop          | 1 / each       |    |
|           |          | Transfer tube                  | 1              |   |
|           |          | Pasteur Pipette                | 1              |  |
|           |          | Zip Bag                        | 2              |  |
|           |          | Identification Tags            | 2              |  |
|           |          | Exam Request Form              | 2 counterparts | See page 13                                                                           |

# KIT COMPOSITION OUT OF SÃO PAULO

| Visits    | Type Kit | Composition                    | Qty            | Item                                                                                  |
|-----------|----------|--------------------------------|----------------|---------------------------------------------------------------------------------------|
| V-3<br>V3 | Kit C    | 3.5 mL tube with EDTA          | 1              |    |
|           |          | 3.5 mL tube with Separator Gel | 4              |    |
|           |          | 3.5 mL tube with Citrate       | 1              |    |
|           |          | Needle vacuum (25 x 8 mm)      | 1              |    |
|           |          | Holder and Blood Stop          | 1/each         |    |
|           |          | Transfer tube                  | 5              |    |
|           |          | 80 mL Urine Vial               | 1              |   |
|           |          | 10 mL Conical Tube for Urine   | 1              |  |
|           |          | Pasteur Pipette                | 2              |  |
|           |          | Zip Bag                        | 2              |  |
|           |          | Identification Tags            | 2              |  |
|           |          | Exam Request Form              | 2 counterparts | See page 13                                                                           |



# KIT COMPOSITION OUT OF SÃO PAULO

| Visits    | Type Kit | Composition                    | Qty            | Item                                                                                  |
|-----------|----------|--------------------------------|----------------|---------------------------------------------------------------------------------------|
| V-1<br>V1 | Kit D    | 3.5 mL tube with EDTA          | 1              |    |
|           |          | 3.5 mL tube with Separator Gel | 4              |    |
|           |          | 3.5 mL tube with Citrate       | 1              |    |
|           |          | Needle vacuum (25 x 8 mm)      | 1              |    |
|           |          | Holder and Blood Stop          | 1 / each       |    |
|           |          | Transfer tube                  | 5              |   |
|           |          | Pasteur Pipette                | 2              |  |
|           |          | Zip Bag and Blood Stop         | 2              |  |
|           |          | Identification Tags            | 2              |  |
|           |          | Exam Request Form              | 2 counterparts | See page 13                                                                           |

# GENERAL RECOMMENDATIONS FOR COLLECTION KITS

- ✓ Store the collection kits in an appropriate place, preferably with restricted access;
- ✓ Kits must be stored in a ventilated environment (**15-25°C**) and away from light;
- ✓ Frequently check the expiry dates of the kits and rotate the stock if necessary (prioritize the use of kits with a shorter expiry date);
- ✓ Deadline for replenishing kits (kit production and submission) at research centers: 15 days.
- ✓ Research center must inform GC-2 about the occurrence of losses, damage to kits or the existence of expired kits so that we can update the study kit inventory controlled by GC-2.

# TUBE IDENTIFICATION

Tube **bar code number**  
(same as the request  
form)

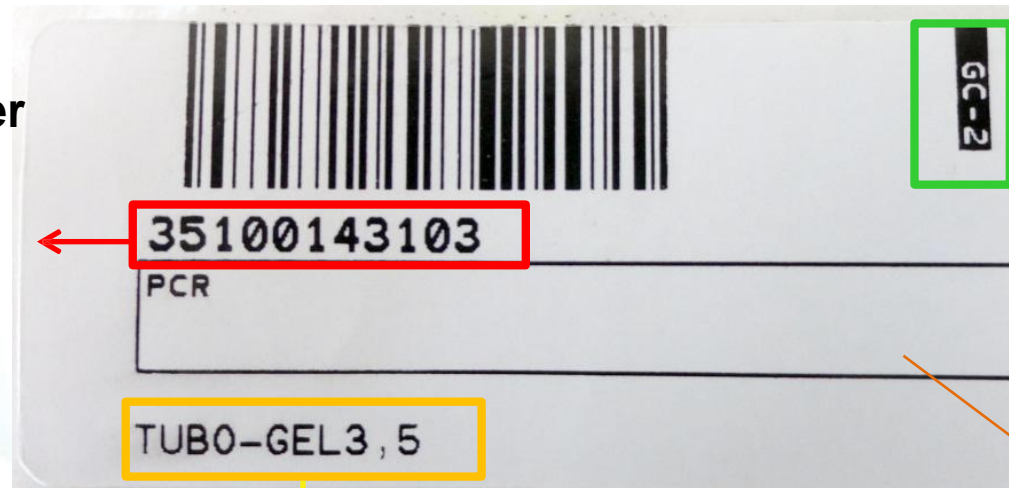

GC-2 Identification  
Central Laboratory

Tube and volume identification

Abbreviations of  
**analytes/exams**  
contained in the  
tube

# TUBE LABELING

PLEASE REVIEW THE LABELING  
OF THE TUBES AND VIALS.

The first 9 digits must be the same on all labels of the components of the research subject kit

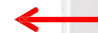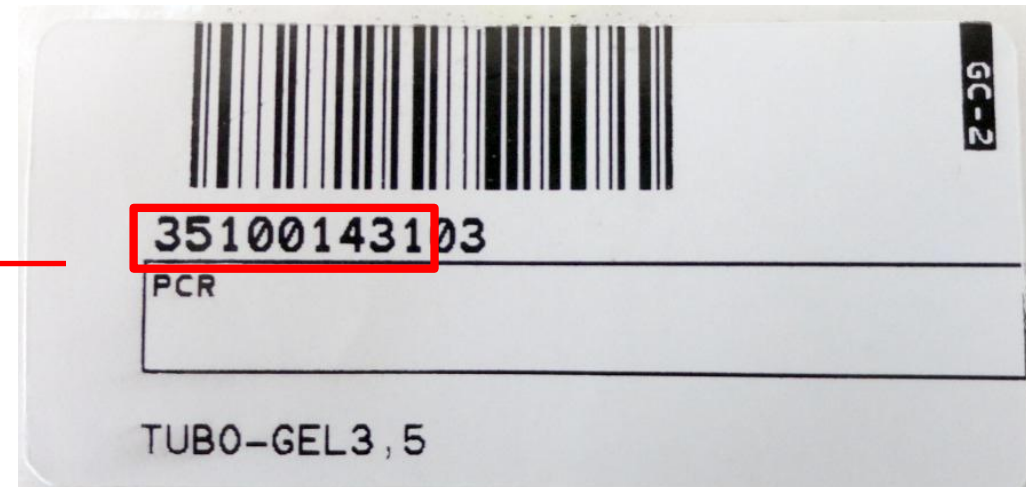

- If divergences are detected in the **first 9 digits** of the tube/vial labels vs. **the first 9 digits** of the code shown in the right field of the requirement form, please **DISPOSE** of these labels and use the labels for manual filling that are available in the kit and immediately inform GC-2 before submitting the material.
- **Labels** attached to tubes/vials must match the pre-specified numbers on the requirement form = **IMPORTANT VERIFICATION** to avoid changing tubes between different research subjects
- **TUBES WITH NO IDENTIFICATION LABEL CANNOT BE ANALYZED.**

# LABORATORY REQUIREMENT FORM

Avenida Nações Unidas, 12.399  
Edifício Landmark - 12º andar - conj 125  
CEP 04578-000, São Paulo - SP  
Tel: +55 11 3512-6911  
Fax: +55 11 3512-6911

GC2

3612  
\*3612

Biquetas: 351-001554-01 351-001407-11  
351-001554-01 351-001407-11  
351-001554-01 351-001407-12  
351-001554-01 351-001407-13  
351-001554-01 351-001407-14  
351-001554-01 351-001407-15

### FORMULÁRIO DE REQUISIÇÃO LABORATORIAL

Iniciais Paciente :

Data de Nascimento : \_\_\_\_ / \_\_\_\_ / \_\_\_\_  
Dia Mês Ano

Nº de Triagem : \_\_\_\_\_

Nº de Randomização : \_\_\_\_\_

Data da Coleta : \_\_\_\_ / \_\_\_\_ / \_\_\_\_  
Dia Mês Ano

Horário : \_\_\_\_ : \_\_\_\_ (24 horas)  
HH MM

Sexo :  Feminino  Masculino

Visita

VT1  VISITA EXTRA:  LACIDO URICO  
 ALBUMINA  
 AMILASE  
 ANTI HBS  
 CLORO  
 HEMOGRAMA

#### Amostras Enviadas

| Preenchido pelo Centro |            |                            |                          |                          | Preenchimento GC-2 |
|------------------------|------------|----------------------------|--------------------------|--------------------------|--------------------|
| Condição Envio         | Quantidade | Tubos enviados:            | Kit Customizado          | Lista de Verificação     | Nº de Tubos        |
| Refrigerado            | 2          | Tubo com gel separador 3,5 | <input type="checkbox"/> | <input type="checkbox"/> |                    |
| Refrigerado            | 1          | Tubo Edta 3,5 ml           | <input type="checkbox"/> | <input type="checkbox"/> |                    |

Para maiores informações, ler as instruções no Manual de Procedimentos Laboratoriais

#### Comentários Adicionais:

Preenchido por: \_\_\_\_\_ Assinatura: \_\_\_\_\_ em \_\_\_\_\_

PRIMEIRA VIA: Envie junto com as amostras para GC-2

SEGUNDA VIA: Arque no Centro de Pesquisa

## CAUTIONS

1. Use **UPPERCASE** letters with legible handwriting.
2. Complete all fields with no exception - highlighted in **RED**.
3. In case of **RETEST**, select the necessary exams
4. If the **BHCG** test is not necessary, justify it in the NOTE field (e.g. Not Applicable - NA)
5. The form must be signed and dated (according to GCP - Good Clinical Practices) in the field highlighted in **GREEN**
6. In case of an error in filling out the form, **NEVER** erase or use correction fluid. Cross it out, put your initials and date, then enter the correct information on the side.
7. Send the original copy of the completed form along with the samples to the Central Laboratory.
8. Keep the 2nd counterpart completed in the research center files.

# COLLECTION ORDER

## Order for the collection of the sample tubes

*Clinical and Laboratory Standards Institute (CLSI-Former NCCLS)  
recommendations – 2003 – H3-A5 - §8.10.2*

1<sup>st</sup>   
Blue  
**CITRATE TUBE**

2<sup>nd</sup>   
Yellow  
**TUBE WITH SEPARATOR GEL**

3<sup>rd</sup>   
Purple  
**TUBE EDTA**

# SAMPLE PANEL

## V-3 and V3 – COLLECTION - São Paulo

|                                                     | <b>BLOOD COUNT<br/>(HB1AC in V-3)</b>                                                                       | <b>BIOCHEMISTRY</b>                                                                                                        | <b>BHCG (V-3 and V3)<br/>TSH (only V-3)</b>                                                                                 | <b>COAGULOGRAM</b>                                                                                              | <b>URINE 1</b>                                                                                              |
|-----------------------------------------------------|-------------------------------------------------------------------------------------------------------------|----------------------------------------------------------------------------------------------------------------------------|-----------------------------------------------------------------------------------------------------------------------------|-----------------------------------------------------------------------------------------------------------------|-------------------------------------------------------------------------------------------------------------|
| <b>Collection Material</b>                          | <br>1 EDTA Tube – 3.5 mL   | <br>3 Tubes with separator gel – 3.5 mL   | <br>1 Tube with separator gel – 3.5 mL   | <br>1 Citrate Tube – 3.5 mL  | <br>80 mL urine vial     |
| <b>Submission Material</b>                          | TOTAL BLOOD                                                                                                 | TOTAL BLOOD                                                                                                                | TOTAL BLOOD                                                                                                                 | PLASMA                                                                                                          | URINE                                                                                                       |
| <b>Submission Condition</b>                         | REFRIGERATED                                                                                                | REFRIGERATED                                                                                                               | REFRIGERATED                                                                                                                | FROZEN                                                                                                          | REFRIGERATED                                                                                                |
| <b>Material sent to the Central Laboratory GC-2</b> | <br>1 EDTA Tube – 3.5 mL | <br>3 Tubes with separator gel – 3.5 mL | <br>1 Tube with separator gel – 3.5 mL | <br>1 Transfer tube – 5 mL | <br>10 mL conical tube |

# SAMPLE PANEL

## V-1 and V1 – COLLECTION - São Paulo

### BLOOD COUNT

### BIOCHEMISTRY

### BHCG

### COAGULOGRAM

#### Collection Material

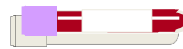

1 EDTA Tube – 3.5 mL

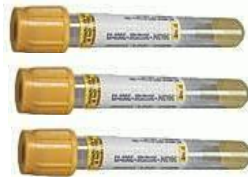

3 Tubes with separator gel  
– 3.5 mL

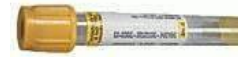

1 Tube with separator gel – 3.5 mL

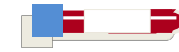

1 Citrate Tube – 3.5 mL

#### Submission Material

TOTAL BLOOD

TOTAL BLOOD

TOTAL BLOOD

PLASMA

#### Submission Condition

REFRIGERATED

REFRIGERATED

REFRIGERATE  
D

FROZEN

#### Material sent to the Central Laboratory GC-2

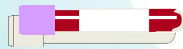

1 EDTA Tube – 3.5 mL

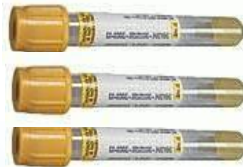

3 Tubes with separator gel  
– 3.5 mL

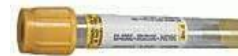

1 Tube with separator gel  
– 3.5 mL

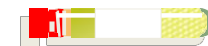

1 Transfer tube  
– 5 mL



# SAMPLE PANEL

## V-3 and V3 – COLLECTION - Out of São Paulo

|                                                     | <b>BLOOD COUNT<br/>(HB1AC in V-3)</b>                                                                       | <b>BIOCHEMISTRY</b>                                                                                                      | <b>BHCG and TSH<br/>TSH (only V-3)</b>                                                                                    | <b>COAGULOGRAM</b>                                                                                              | <b>URINE 1</b>                                                                                              |
|-----------------------------------------------------|-------------------------------------------------------------------------------------------------------------|--------------------------------------------------------------------------------------------------------------------------|---------------------------------------------------------------------------------------------------------------------------|-----------------------------------------------------------------------------------------------------------------|-------------------------------------------------------------------------------------------------------------|
| <b>Collection Material</b>                          | <br>1 EDTA Tube – 3.5 mL   | <br>3 Tubes with separator gel – 3.5 mL | <br>1 Tube with separator gel – 3.5 mL | <br>1 Citrate Tube – 3.5 mL  | <br>80 mL urine vial     |
| <b>Submission Material</b>                          | TOTAL BLOOD                                                                                                 | SERUM                                                                                                                    | SERUM                                                                                                                     | PLASMA                                                                                                          | URINE                                                                                                       |
| <b>Submission Condition</b>                         | REFRIGERATED                                                                                                | REFRIGERATED                                                                                                             | REFRIGERATED                                                                                                              | FROZEN                                                                                                          | REFRIGERATED                                                                                                |
| <b>Material sent to the Central Laboratory GC-2</b> | <br>1 EDTA Tube – 3.5 mL | <br>3 Transfer tubes – 5 mL           | <br>1 Transfer tube – 5 mL           | <br>1 Transfer tube – 5 mL | <br>10 mL conical tube |

# SAMPLE PANEL

## V-1 and V1 – COLLECTION - Out of São Paulo

|                                                     | <b>BLOOD COUNT</b>                                                                                          | <b>BIOCHEMISTRY</b>                                                                                                       | <b>BHCG</b>                                                                                                               | <b>COAGULOGRAM</b>                                                                                              |
|-----------------------------------------------------|-------------------------------------------------------------------------------------------------------------|---------------------------------------------------------------------------------------------------------------------------|---------------------------------------------------------------------------------------------------------------------------|-----------------------------------------------------------------------------------------------------------------|
| <b>Collection Material</b>                          | <br>1 EDTA Tube – 3.5 mL   | <br>3 Tubes with separator gel – 3.5 mL | <br>1 Tube with separator gel – 3.5 mL | <br>1 Citrate Tube – 3.5 mL  |
| <b>Submission Material</b>                          | TOTAL BLOOD                                                                                                 | SERUM                                                                                                                     | SERUM                                                                                                                     | PLASMA                                                                                                          |
| <b>Submission Condition</b>                         | REFRIGERATED                                                                                                | REFRIGERATED                                                                                                              | REFRIGERATED                                                                                                              | FROZEN                                                                                                          |
| <b>Material sent to the Central Laboratory GC-2</b> | <br>1 EDTA Tube – 3.5 mL | <br>3 Transfer tubes – 5 mL           | <br>1 Transfer tube – 5 mL           | <br>1 Transfer tube – 5 mL |

# GENERAL VACUUM COLLECTION INSTRUCTIONS

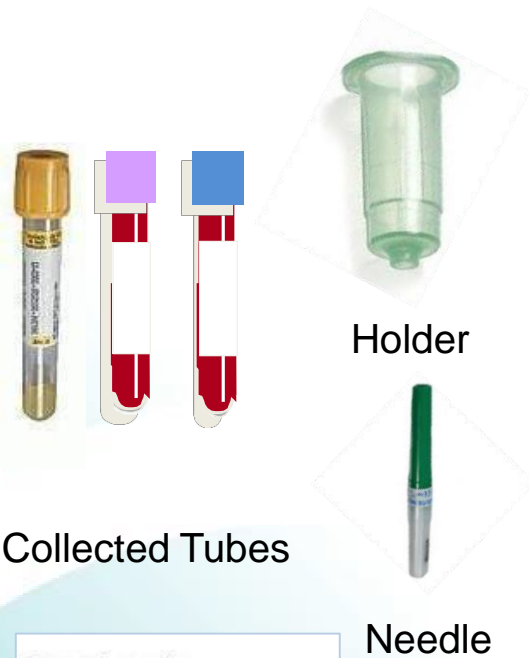

- Universal precautions must be taken whenever working with blood or any biological fluid.
- Always have at hand all the collection material necessary for the procedure.
- Accommodate the subject in a comfortable position (sitting or lying down).
- The collection must be made by direct vein puncture, for minimal venous occlusion, choose the antecubital vein (as shown in the figure beside).
- Connect the tube under vacuum and ensure complete sample aspiration.
- Carefully remove the needle and compress immediately with dry gauze or cotton wool, for about 1 minute and then place the blood stop.
- After finishing the collection, dispose of the needle in an appropriate container for waste.

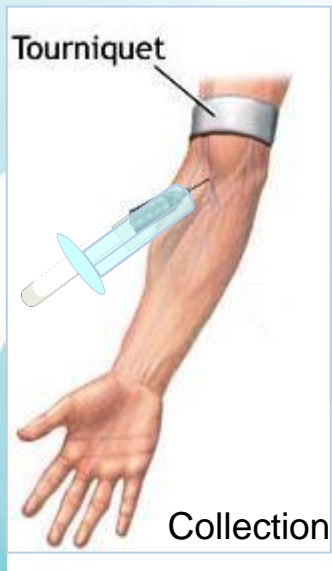

# STANDARD SAMPLE TREATMENT PROCEDURES SÃO PAULO

Visits V-3, V-1, V1 and V3

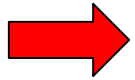

Collect blood samples in the following order

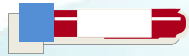

1 Citrate Tube – 3.5 mL

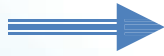

- Homogenize the tube carefully by inversion, about 5 to 8 times
- Centrifuge **within 2 hours after collection** for minutes at 1500g
- Visually divide the plasma into 03 parts as shown in the figure.
- **CAREFULLY** transfer the **two upper parts** of the plasma (about 1 mL), not resuspending the liquid. Leave the third part of the plasma in the tube
- Freeze the sample (-20°C) until the time of submission (submit it **frozen** - require dry ice).

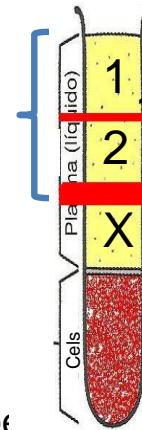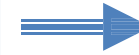

Frozen  
Samples

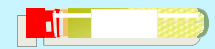

1 Transfer tubes  
– 5 mL

# STANDARD SAMPLE TREATMENT PROCEDURES SÃO PAULO

Visits V-3, V-1, V1 and V3

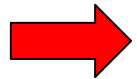

Collect blood samples in the following order

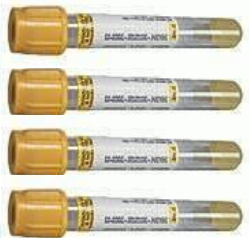

4 Tubes with separator gel – 3.5 mL

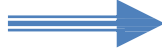

- Place in an upright position to clot for 15-30 minutes.
- Centrifuge immediately at 1500xg for 15 minutes
- Keep the sample refrigerated until submission time.

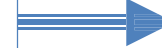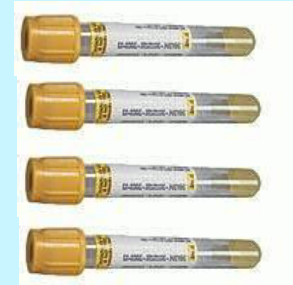

4 Tubes with separator gel – 3.5mL

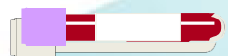

1 EDTA Tube – 3.5 mL

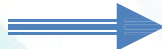

- Immediately after collection**, the blood sample tube with EDTA (purple cap) needs to be gently inverted 8-10 times to obtain a complete mixture with the anticoagulant. It is extremely important that this step is carried out.

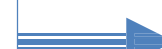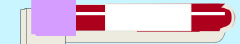

1 EDTA Tube – 3.5 mL

Refrigerated  
Samples

# STANDARD SAMPLE TREATMENT PROCEDURES SÃO PAULO

Visits V-3 and V3

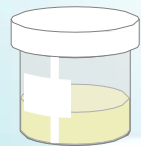

80 mL urine vial

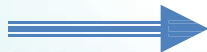

- Collect the first urine in the morning or after 4 hours without urinating.
- Discard the first jet and collect the middle jet
- Guide the subject to clean the genitals with water and mild soap.
- Transfer 10mL to the conical tube with the aid of a pasteur pipette
- Keep the sample refrigerated until submission time.

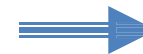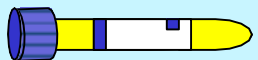

1 Conical tube – 10 mL

Refrigerated  
Samples

# STANDARD SAMPLE TREATMENT PROCEDURES OUT OF SÃO PAULO

Visits V-3, V-1, V1 and V3

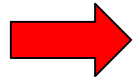

Collect blood samples in the following order

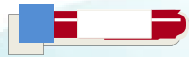

1 Citrate Tube – 3.5 mL

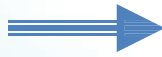

- Homogenize the tube carefully by inversion, about 5 to 8 times
- Centrifuge **within 2 hours after collection** for minutes at 1500g
- Visually divide the plasma into 03 parts as shown in the figure.
- **CAREFULLY** transfer the **two upper parts** of the plasma (about 1 mL), not resuspending the liquid. Leave the third part of the plasma in the tube.
- Freeze the sample (-20°C) until the time of submission (submit it **frozen** - require dry ice).

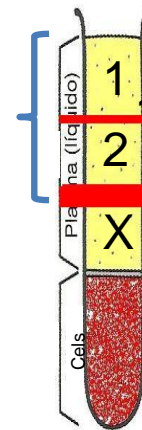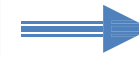

Frozen  
Samples



1 Transfer tubes – 5 mL

# STANDARD SAMPLE TREATMENT PROCEDURES OUT OF SÃO PAULO

Visits V-3, V-1, V1 and V3

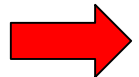

Collect blood samples in the following order

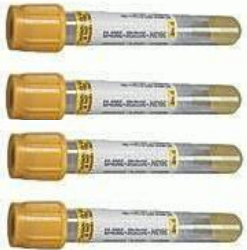

4 Tubes with separator gel – 3.5 mL

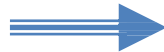

- Place in an upright position to clot for 15-30 minutes.
- Centrifuge immediately at 1500xg for 15 minutes
- Transfer the serum to the transfer tube with the help of a pasteur pipette
- Keep the sample refrigerated (4-8°) until submission time.

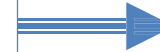

Refrigerated  
Samples

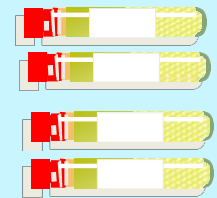

4 Transfer tubes – 5 mL

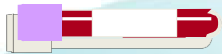

1 EDTA Tube – 3.5 mL

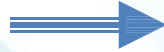

- Immediately after collection**, the blood sample tube with EDTA (purple cap) needs to be gently inverted 8-10 times to obtain a complete mixture with the anticoagulant. It is extremely important that this step is carried out.
- Keep the sample refrigerated (refrigerator 4-8°) until the submission time.

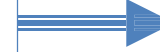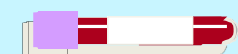

1 EDTA Tube – 3.5 mL



# STANDARD SAMPLE TREATMENT PROCEDURES OUT OF SÃO PAULO

Visits V-3 and V3

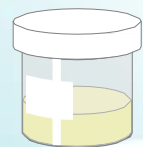

80 mL urine vial

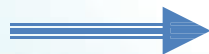

- Collect the first urine in the morning or collect after 4 hours without urinating.
- Discard the first jet and collect the middle jet
- Guide the subject to clean the genitals with water and mild soap.
- Transfer 10mL to the conical tube with the aid of a pasteur pipette
- Keep the sample refrigerated until submission time.

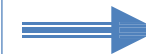

Refrigerated  
Samples

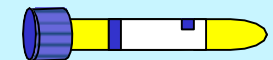

1 Conical tube – 10 mL

# SAMPLE CENTRIFUGATION

Centrifugation at 1500 x g for 15 min

**ATTENTION:** It is important that the tubes are equally balanced in the centrifuge:

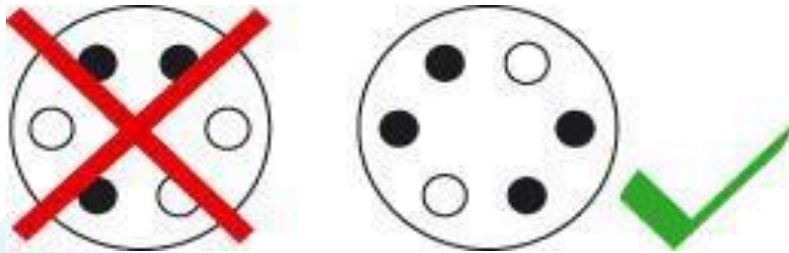

Table referring to g = 1500 (Radius vs. Velocity)

| RADIUS (cm) | VELOC. (rpm)   | RADIUS (cm) | VELOC. (rpm)   |
|-------------|----------------|-------------|----------------|
| 7           | 4 300 at 4 400 | 17          | 2 800 at 2 900 |
| 8           | 4 000 at 4 100 | 18          | 2 700 at 2 800 |
| 9           | 3 800 at 3 900 | 19          | 2 600 at 2 700 |
| 10          | 3 600 at 3 700 | 20          | 2 500 at 2 600 |
| 11          | 3 400 at 3 500 | 21          | 2 500 at 2 600 |
| 12          | 3 300 at 3 400 | 22          | 2 400 at 2 500 |
| 13          | 3 200 at 3 300 | 23          | 2 400 at 2 500 |
| 14          | 3 000 at 3 100 | 24          | 2 300 at 2 400 |
| 15          | 2 900 at 3 000 | 25          | 2 300 at 2 400 |
| 16          | 2 800 at 2 900 | 26          | 2 200 at 2 300 |

## NOTE

If the centrifuge available at the center is not able to carry out the necessary RPMs, as calculated in "FORMULA 1", proceed as follows:

- 1) Calculate the maximum force (No. of g) that the centrifuge can apply, using FORMULA 2.
- 2) Substitute this value in FORMULA 3 to determine the amount of time needed in the centrifuge of the center.

### Formula 1

$RPM = 1000 \times \text{square root} [(N.\text{of } g) / (11.18) \times \text{radius}(\text{cm})]$

### Formula 2

$g = 11.18 [(RPM/1000)^2 \times \text{radius} (\text{cm})]$

### Formula 3

Time (centrifuge of the center) =

$$\frac{(\text{Time required} \times \text{No. of } g \text{ required})}{\text{No. of } g \text{ of the centrifugation of the center}}$$

# KIT REQUIREMENT

## Formulário de Solicitação de Kits

Enviar por Fax: (11) 3528 7404 ou email: [monitoria@gcdois.com.br](mailto:monitoria@gcdois.com.br)

 Complete com letra legível utilizando caneta esferográfica preta

|                     |
|---------------------|
| DATA DE HOJE:       |
| CENTRO DE PESQUISA: |
| INVESTIGADOR:       |
| SOLICITANTE         |
| TELEFONE:           |
| PROTOCOLO:          |
| PATROCINADOR:       |

| KITS SOLICITADOS PELO CENTRO |     |                          |                          |                          | KITS AUTORIZADOS PELO PATROCINADOR (se aplicável) |                |
|------------------------------|-----|--------------------------|--------------------------|--------------------------|---------------------------------------------------|----------------|
| NOME DA VISITA               | QT. | MOTIVO                   |                          |                          |                                                   | QT. AUTORIZADA |
|                              |     | REABASTECIMENTO          | EXPIRADO                 | PERDIDO                  | OUTROS                                            |                |
|                              |     | <input type="checkbox"/> | <input type="checkbox"/> | <input type="checkbox"/> |                                                   |                |
|                              |     | <input type="checkbox"/> | <input type="checkbox"/> | <input type="checkbox"/> |                                                   |                |
|                              |     | <input type="checkbox"/> | <input type="checkbox"/> | <input type="checkbox"/> |                                                   |                |
|                              |     | <input type="checkbox"/> | <input type="checkbox"/> | <input type="checkbox"/> |                                                   |                |

ATENÇÃO: PRAZO DE ENTREGA DE 15 DIAS

| MATERIAL DE TRANSPORTE                              | QUANTIDADE SOLICITADA PELO CENTRO | QUANTIDADE AUTORIZADA PELO PATROCINADOR (se aplicável) |
|-----------------------------------------------------|-----------------------------------|--------------------------------------------------------|
| <input type="checkbox"/> CAIXAS REFRIGERADAS UN3373 |                                   |                                                        |
| <input type="checkbox"/> GELO REUTILIZAVEL          |                                   |                                                        |

| DOCUMENTOS                                                  | QUANTIDADE |
|-------------------------------------------------------------|------------|
| <input type="checkbox"/> FORMULÁRIO DE REQUISIÇÃO DE EXAMES |            |
| <input type="checkbox"/> AWB                                |            |
| <input type="checkbox"/> DECLARAÇÃO DE TRANSPORTE           |            |
| <input type="checkbox"/> OUTROS:                            |            |

### ATUALIZAÇÃO DO ENDEREÇO DE ENVIO (SE NECESSÁRIO):

APENAS PARA ESTE ENVIO - ENDEREÇO: \_\_\_\_\_

ALTERAÇÃO PERMANENTE DO ENDEREÇO DE ENVIO: \_\_\_\_\_

OBSERVAÇÃO: \_\_\_\_\_

Av. Nações Unidas, 12.3996 conj. 125A – Ed. Landmark  
04578-000 - São Paulo – SP  
Tel. (11) 3528-7406 | Fax. (11) 3528-7404

Send to FAX: 3528-7404

or

Via email described on slide 02

Contact GC-2 monitoring 15 days in advance to supply with new kits if necessary.

**KITS DELIVERY TIME AFTER REQUIREMENT: NO MORE THAN 15 BUSINESS DAYS**

# REUSABLE ICE HANDLING INSTRUCTIONS

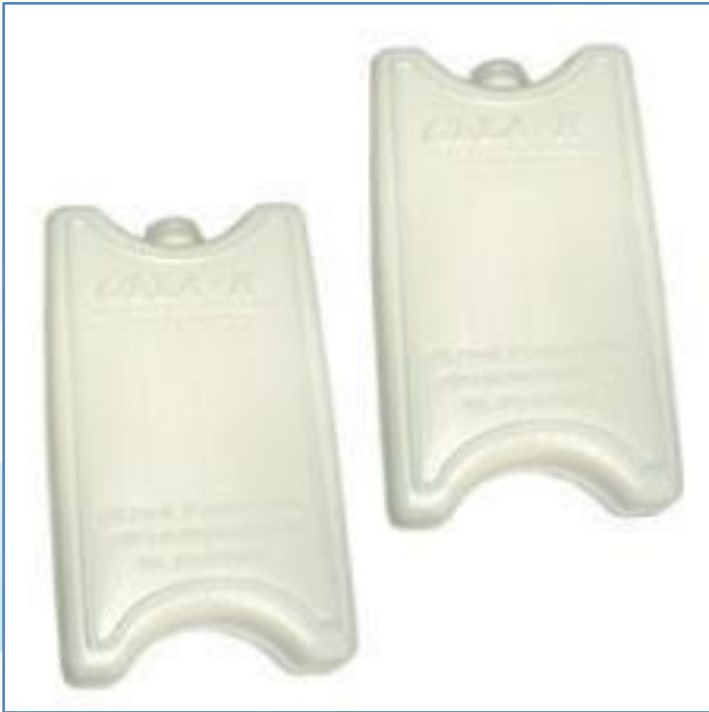

Manufacturer Description:  
Rigid Reusable Ice (Gela Kent - GK) – 200mL

Specifications:  
Rigid ice  
Technical data  
Volume: 200mL.  
Ice size: 12x7x3cm..  
Ice composition: non-toxic acrylic thickener, polyethylene.  
Manufacturer: Gela Kent - GK produtos térmicos e hospitalares Ltda.

- ✓ Keep the reusable ice in the freezer.
- ✓ 3 reusable ice packs will be used per box (3 liters).
- ✓ Accommodate one (1) ice at the bottom of the box and one (1) ice on each side (total = 3).
- ✓ **WARNING: do not place the collection tubes in direct contact with the reusable ice. Always **protect** it using paper towels or plastic bags.**

# PACKAGING INSTRUCTIONS FOR REFRIGERATED SAMPLES

**1<sup>st</sup>** Insert the three reusable ice units on the bottom and sides of the box

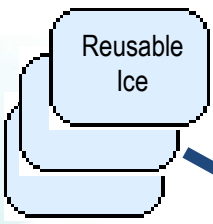

**2<sup>nd</sup>** Insert the zip bags with the samples, maximum 4 zip bags (no more than 5 tubes each) per box

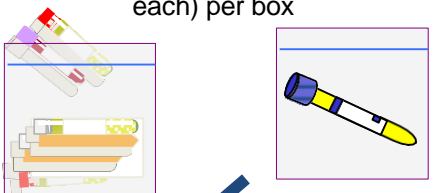

Note that urine must be sent in a zip bag separate from the tubes

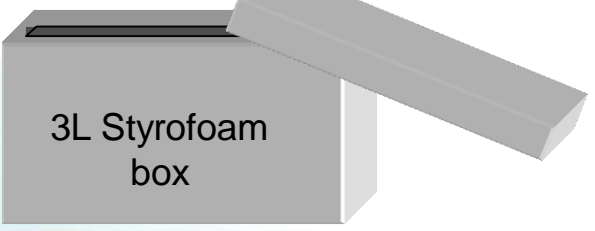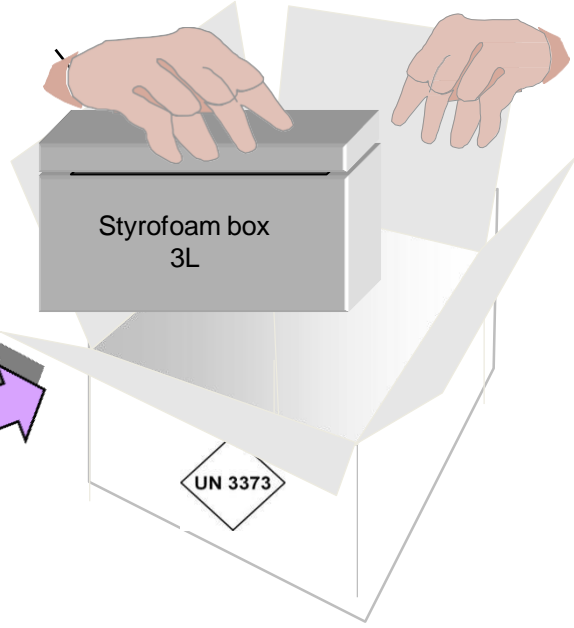

UN 3373

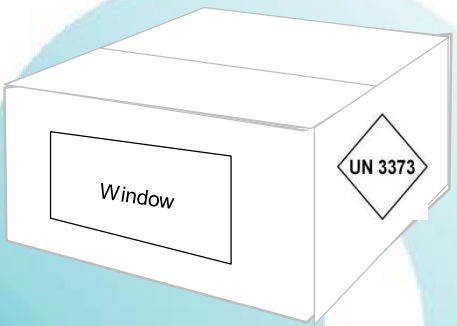

**4<sup>th</sup>** Attach the AWB/Transport Statement to the "window" on the outside of the cardboard box

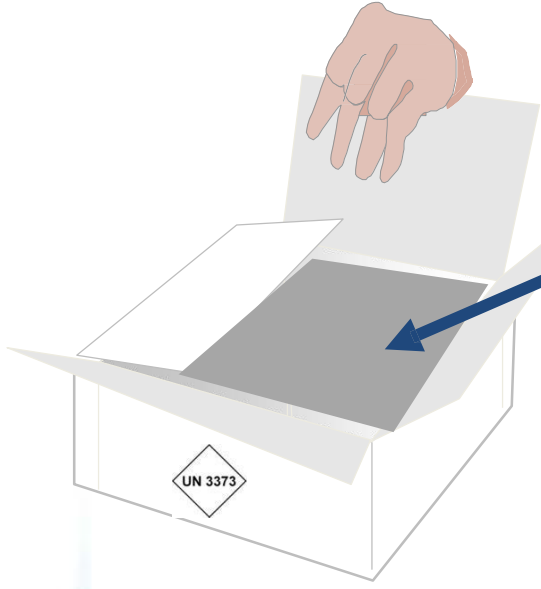

**3<sup>rd</sup>** Place one counterpart of each Request Form for each sample of subject sent, between the styrofoam box and the cardboard box

GC-2  
 Avenida Magalhães Mendes, 12.350  
 Edifício Lactobios - 12080-900 São Paulo - SP  
 Unidade: Hematólogia Coagulada  
 Fone: 11 3123-2197

Center X  
 XXXXXXXXXXXXXXXXXXXXXXX  
 XXXXXXXXXXXXXXXXXXXXXXX  
 XXXXXXXXXXXXXXXXXXXXXXX  
 XXXXXXXXXXXXXXXXXXXXXXX  
 XXXXXXXXXXXXXXX

**FORM OF REQUIREMENT OF EXAM**

Initials:    Date of Collection: \_\_\_\_/\_\_\_\_/\_\_\_\_  
 Screening No.: TR \_\_\_\_\_ Collection time: \_\_\_\_:\_\_\_\_:\_\_\_\_ (24 hours)  
 Randomization No.: \_\_\_\_\_ Fasting:  yes  no  
 Date of Birth: \_\_\_\_/\_\_\_\_/\_\_\_\_ Weight: \_\_\_\_\_ Height: \_\_\_\_\_  
 Gender:  Female  Male  HCG is required?  yes  no  
 Note: \_\_\_\_\_

Visit  
 Visit V6  Other: Visit: \_\_\_\_\_

| Submitted Samples    |          |                                    |                          | Completed by GC-2        |          |
|----------------------|----------|------------------------------------|--------------------------|--------------------------|----------|
| Submission Condition | Quantity | Submitted Tubes                    | Verification List        | Number of Tubes Returned | Initials |
| Refrigerated         | 1        | EDTA Tube - 2.0 mL - Purple Cap    | <input type="checkbox"/> |                          |          |
| Refrigerated         | 2        | Transfer Tube - 5.0 mL - Red Cap   | <input type="checkbox"/> |                          |          |
| Refrigerated         | 2        | Fluoride Tubes - 5.0 mL - Gray Cap | <input type="checkbox"/> |                          |          |
| Refrigerated         | 1        | Citrate Tube - 10 mL               | <input type="checkbox"/> |                          |          |

For more details, check the laboratory procedures manual.  
 Additional Data: \_\_\_\_\_  
 Completed by: \_\_\_\_\_ Signature: \_\_\_\_\_ Date: \_\_\_\_/\_\_\_\_/\_\_\_\_  
 Filled by: \_\_\_\_\_ Signature: \_\_\_\_\_ Date: \_\_\_\_/\_\_\_\_/\_\_\_\_  
**FIRST COUNTERPART:** Send along with the refrigerated samples to the laboratory.  
**SECOND COUNTERPART:** File at the Clinical Research Center.

ACH-TRV-03(03/09)\_FINAL VERSION 1.0 - 3/22/2011

# PACKAGING INSTRUCTIONS FOR FROZEN SAMPLES

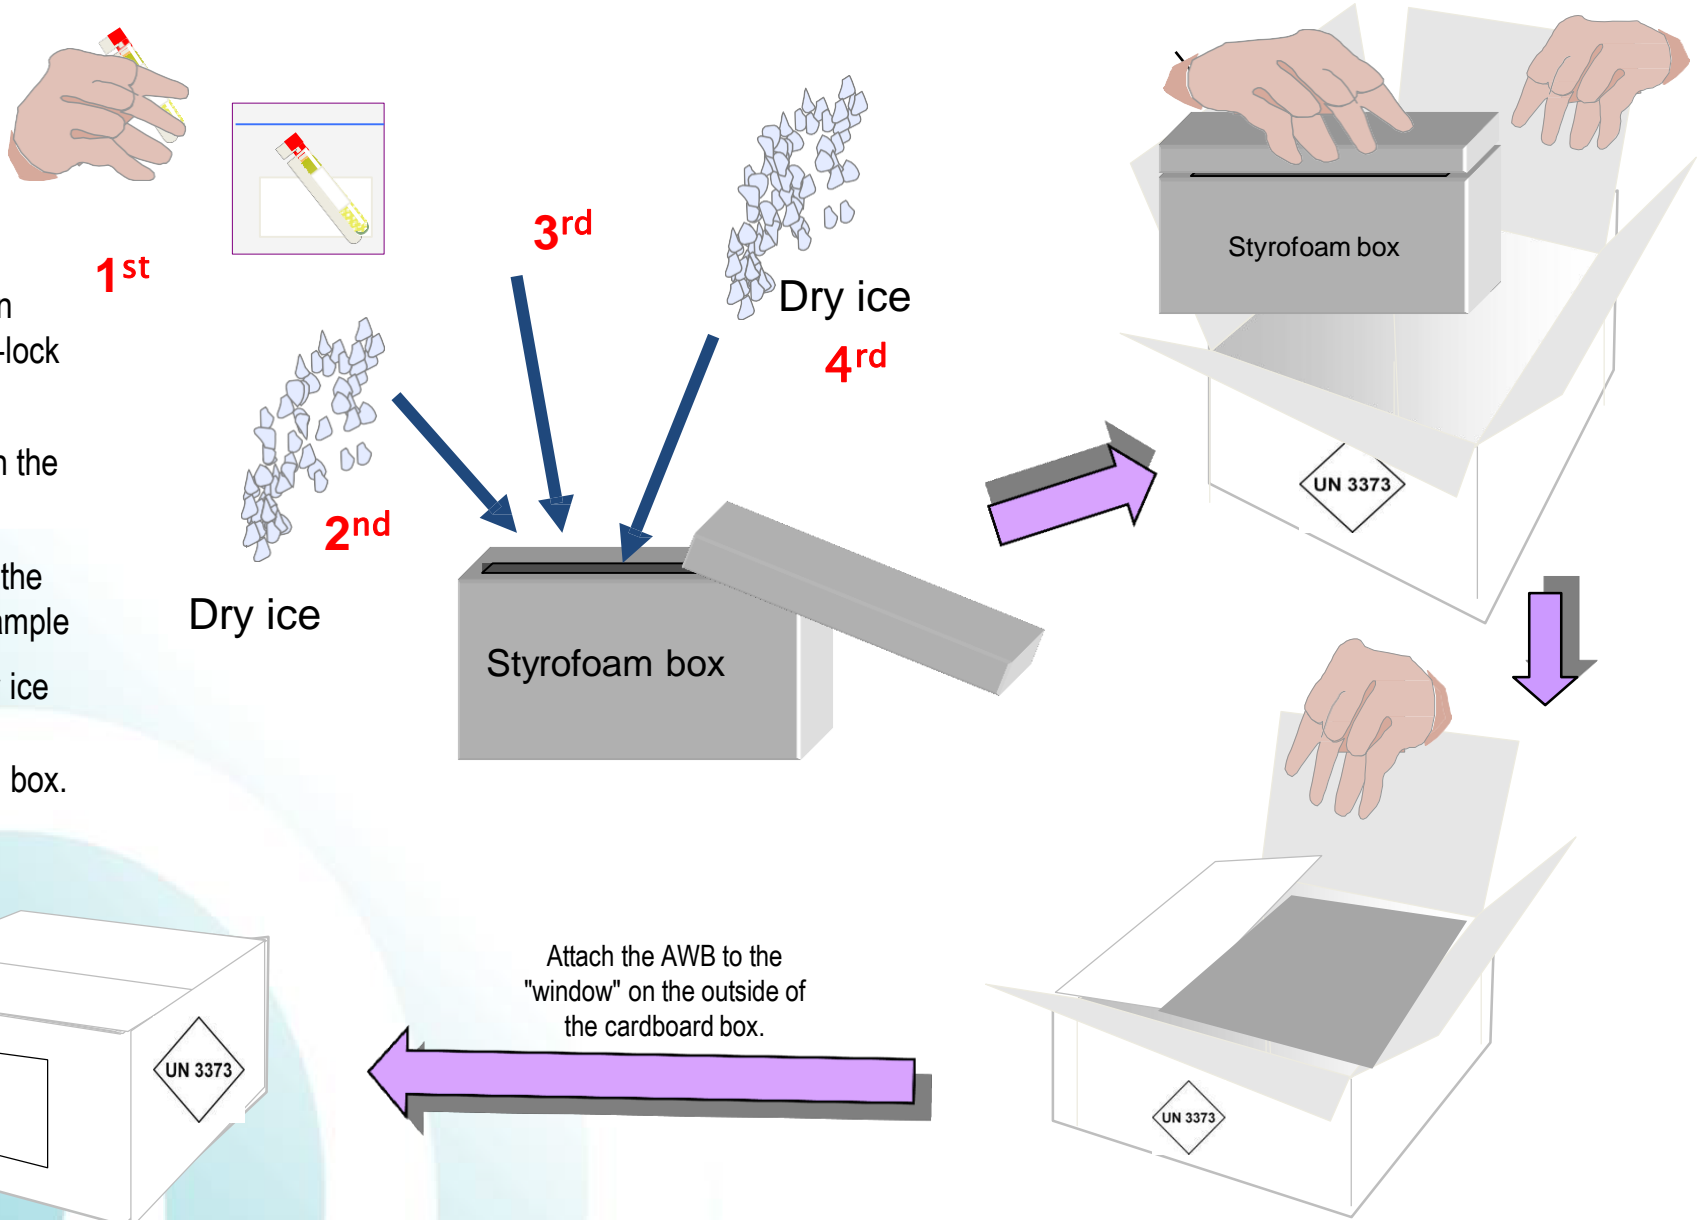

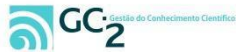

## Declaração

Declaramos para os devidos fins, que estamos transportando através da SPS Logística mercadoria abaixo descrita, somente para Análises / Pesquisa Clínica; sem fins comerciais, razão porque não se sujeita à emissão de Nota Fiscal, mercadoria esta que se destina à Cidade de São Paulo, Estado de São Paulo.

**DESCRIÇÃO DO CONTEÚDO: Espécime para Diagnóstico Não Infeccioso (Biological Substance - Category B UN3373)**

Espécime para diagnóstico material humano, sendo transportado para propósitos de diagnóstico ou investigação clínica (UN3373). As embalagens utilizadas seguem as determinações da instrução de embalagem 650, sendo que os materiais acondicionados não apresentam qualquer perigo de contágio.

**Em caso de acidente, quebra ou vazamento informar ao destinatário pelo telefone (11) XXX-XXXX**

**Responsável Destinatário: Sr. XXXX - Laboratório XXXXX.**

**Condição de Material**  gelo seco  refrigerado  ambiente

**Peso Bruto :**

**Quantidade de ml:** \_\_\_\_\_

**Estudo:**

**REMETENTE:**

Nome da Instituição :

Investigador ou Responsável :

Endereço :

Cep:

País :

**DESTINATÁRIO:**

Nome da Instituição :

Responsável :

Endereço :

Estado e Cidade :

País : Brasil

Telefone : (11)

**FINALIDADE:** Análise Clínica Laboratorial

Certo de haveremos atendido, as solicitações desta Companhia, conforme descrito no Manual da IATA, edição 2009, seção 2.9 itens 11-01 e 11-06.

\_\_\_\_\_  
Nome do Responsável / RG: \_\_\_\_\_ / CPF: \_\_\_\_\_ / TEL: \_\_\_\_\_

- ✓ The Transport Statement will be sent to the center together with AWB.
- ✓ The center must send one copy of the transport statement for each set of boxes (refrigerated + frozen)
- ✓ Properly **fill out, sign and stamp** this statement on the day the samples are submitted.
- ✓ If in doubt, contact GC-2.

# STANDARD PROCEDURE FOR SAMPLE SUBMISSION

Use only one AWB (sample submission document), even if you have more than one shipping box. Complete the AWB (in “volumes”) with the total number of boxes.

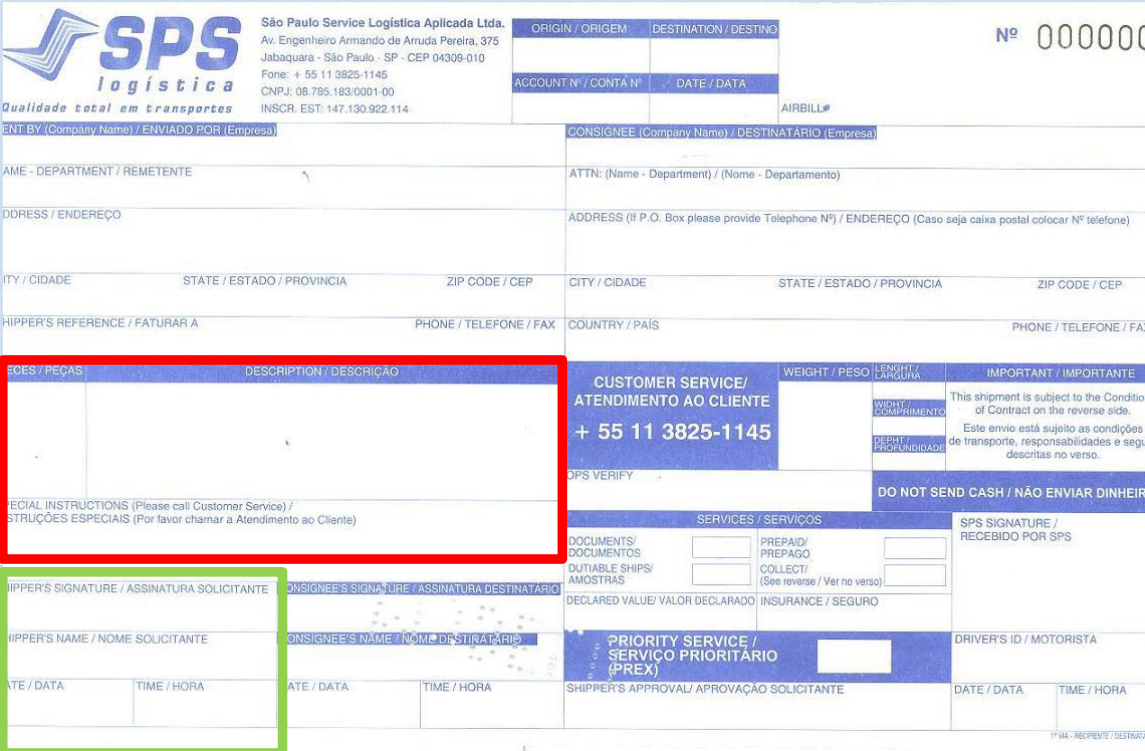

Persons responsible for packaging and shipping samples and dangerous goods (such as dry ice) must receive IATA (International Air Transport Association) training/certification.

- Send e-mail to **SPS Logística Aplicada** (contacts below) and schedule sample collection at least **24 hours** in advance, preferably;

- Inform the Courier:

- Study name
- Investigator's name
- Center code
- Center address and person present at the time of pick-up.

- Complete the **total number of boxes** and the **condition of transport** (refrigerated/frozen) in the part highlighted in **red**.

- Sign and date where indicated (part in **green**)

- Keep a copy of AWB on your files.



## COURIER: SPS LOGÍSTICA APLICADA

**Marco Aurélio Pastor**

marco.pastor@spsla.com.br

**Anderson Silva**

anderson.silva@spsla.com.br

**Anderson Leão**

anderson.leao@spsla.com.br

**Andrea Santos**

andrea.santos@spsla.com.br

Phone: (11) 3825 1145 / (11) 7848 4840

Opening Hours: Monday to Friday 8:00 AM - 6:00 PM

**ATTENTION: Always include all contacts in the scheduling email**

## RESULTS DELIVERY TIME:

**Upon receipt of the samples at the Laboratory, the results will be sent in:**

✓ ***2 days***

## ACCESS MODE:

- **Access all reports made available on the GC-2WEB PORTAL using a specific center user and password that will be provided at the beginning of the study.**

<http://www.gcdois.com.br/resultado>

- **PI and/or delegated persons should review the laboratory report.**

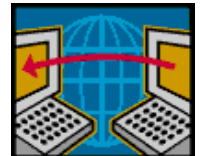

## ➤ ACCESS AND DOWNLOAD OF LABORATORY REPORTS:

1. Access the GC-2 portal (<http://www.gcdois.com.br/resultado>)
2. Insert **LOGIN** and **PASSWORD** in the specific fields (IN RED)

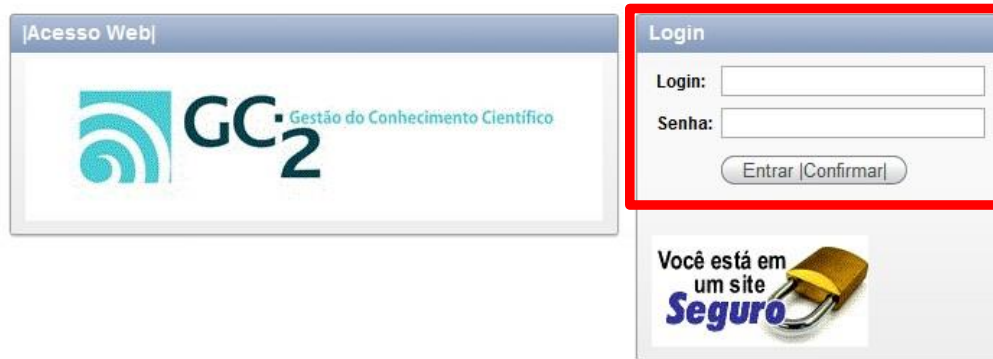

[Acesso Web]

GC<sub>2</sub> Gestão do Conhecimento Científico

Login

Login:

Senha:

Entrar | Confirmar

Você está em um site Seguro

3. On the home page, select the protocol and click Search. All results available for viewing and downloading (pdf) will be shown.



Bem Vindo | Laudos | Alterar Senha

Lista de Laudos

Protocolo  Centro de Pesquisa

Pesquisar

dados não encontrados

# LABORATORY REPORTS

- ✓ KEEP A FILE IN THE CENTER
- ✓ INDIVIDUAL REPORT BY VISIT
- ✓ DOES NOT HAVE ALERTS (FLAGS)
- ✓ AVAILABLE VIA PORTAL GC2

| INFORMAÇÃO CONFIDENCIAL                                                                                                                                                                                                                                         |           |                                                                                                                                                                                                               |         |        |            |
|-----------------------------------------------------------------------------------------------------------------------------------------------------------------------------------------------------------------------------------------------------------------|-----------|---------------------------------------------------------------------------------------------------------------------------------------------------------------------------------------------------------------|---------|--------|------------|
| LAUDO DE EXAME                                                                                                                                                                                                                                                  |           |                                                                                                                                                                                                               |         |        |            |
| <p>www.gc2ols.com.br</p> <p>Protocolo: _____ Data Coleta: 05/12/2012<br/>                     Patrocinador: _____ Hora Coleta: 15:00<br/>                     Centro: _____ Data Emissão: _____<br/>                     Investigador: _____ Cod Lab: _____</p> |           |                                                                                                                                                                                                               |         |        |            |
| <b>ALBUMINA</b>                                                                                                                                                                                                                                                 |           |                                                                                                                                                                                                               |         |        |            |
| Método: Cinético Colorimétrico                                                                                                                                                                                                                                  |           |                                                                                                                                                                                                               |         |        |            |
| Material: SORO                                                                                                                                                                                                                                                  |           |                                                                                                                                                                                                               |         |        |            |
|                                                                                                                                                                                                                                                                 | Resultado | Valor Referência                                                                                                                                                                                              | Unidade | Flag   | Delta Flag |
|                                                                                                                                                                                                                                                                 | 4,0       | 3.2 a 4.8                                                                                                                                                                                                     | g/dL    | Normal |            |
| Liberação: Norma Ohki Nakaguma (CRF 14.978)                                                                                                                                                                                                                     |           |                                                                                                                                                                                                               |         |        |            |
| <b>AMILASE</b>                                                                                                                                                                                                                                                  |           |                                                                                                                                                                                                               |         |        |            |
| Método: Cinético Ellenedo IFCC                                                                                                                                                                                                                                  |           |                                                                                                                                                                                                               |         |        |            |
| Material: SORO                                                                                                                                                                                                                                                  |           |                                                                                                                                                                                                               |         |        |            |
|                                                                                                                                                                                                                                                                 | Resultado | Valor Referência                                                                                                                                                                                              | Unidade | Flag   | Delta Flag |
|                                                                                                                                                                                                                                                                 | 90        | 30 a 118                                                                                                                                                                                                      | U/L     | Normal |            |
| Liberação: Norma Ohki Nakaguma (CRF 14.978)                                                                                                                                                                                                                     |           |                                                                                                                                                                                                               |         |        |            |
| <b>ACIDO URICO</b>                                                                                                                                                                                                                                              |           |                                                                                                                                                                                                               |         |        |            |
| Método: ENZIMÁTICO-URICASE                                                                                                                                                                                                                                      |           |                                                                                                                                                                                                               |         |        |            |
| Material: SORO                                                                                                                                                                                                                                                  |           |                                                                                                                                                                                                               |         |        |            |
|                                                                                                                                                                                                                                                                 | Resultado | Valor Referência                                                                                                                                                                                              | Unidade | Flag   | Delta Flag |
|                                                                                                                                                                                                                                                                 | 5,9       | 3.5 a 7.2                                                                                                                                                                                                     | mg/dL   | Normal |            |
| Liberação: Norma Ohki Nakaguma (CRF 14.978)                                                                                                                                                                                                                     |           |                                                                                                                                                                                                               |         |        |            |
| <b>BHCG</b>                                                                                                                                                                                                                                                     |           |                                                                                                                                                                                                               |         |        |            |
| Método: ELFA                                                                                                                                                                                                                                                    |           |                                                                                                                                                                                                               |         |        |            |
| Material: SORO                                                                                                                                                                                                                                                  |           |                                                                                                                                                                                                               |         |        |            |
|                                                                                                                                                                                                                                                                 | Resultado | Valor Referência                                                                                                                                                                                              | Unidade | Flag   | Delta Flag |
|                                                                                                                                                                                                                                                                 | 5,00      | < 5,00 mUI/mL:<br>Correlacionam-se com a ausência de gravidez.<br>De 5,00 a 50,00 mUI/mL:<br>São duvidosos e sugerem repetição após uma semana.<br>> 50,00 mUI/mL: Correlacionam-se, geralmente com gravidez. |         |        |            |
| Liberação: Norma Ohki Nakaguma (CRF 14.978)                                                                                                                                                                                                                     |           |                                                                                                                                                                                                               |         |        |            |
| <b>BILIRRUBINA TOTAL E FRAÇÕES</b>                                                                                                                                                                                                                              |           |                                                                                                                                                                                                               |         |        |            |
| Método: OXIDACAO COM VANADATO                                                                                                                                                                                                                                   |           |                                                                                                                                                                                                               |         |        |            |
| Material: SORO                                                                                                                                                                                                                                                  |           |                                                                                                                                                                                                               |         |        |            |
|                                                                                                                                                                                                                                                                 | Resultado | Valor Referência                                                                                                                                                                                              | Unidade | Flag   | Delta Flag |
| BILIRRUBINA INDIRETA                                                                                                                                                                                                                                            | 0,9       | 0 a .8                                                                                                                                                                                                        | mg/dL   | Alto   |            |
| BILIRRUBINA TOTAL                                                                                                                                                                                                                                               | 1,2       | 0 a 1.2                                                                                                                                                                                                       | mg/dL   | Normal |            |
| BILIRRUBINA DIRETA                                                                                                                                                                                                                                              | 0,3       | 0 a .4                                                                                                                                                                                                        | mg/dL   | Normal |            |
| Liberação: Norma Ohki Nakaguma (CRF 14.978)                                                                                                                                                                                                                     |           |                                                                                                                                                                                                               |         |        |            |
| <b>CÁLCIO</b>                                                                                                                                                                                                                                                   |           |                                                                                                                                                                                                               |         |        |            |
| Método: COLORIMÉTRICO                                                                                                                                                                                                                                           |           |                                                                                                                                                                                                               |         |        |            |
| Material: SORO                                                                                                                                                                                                                                                  |           |                                                                                                                                                                                                               |         |        |            |
|                                                                                                                                                                                                                                                                 | Resultado | Valor Referência                                                                                                                                                                                              | Unidade | Flag   | Delta Flag |
|                                                                                                                                                                                                                                                                 | 8,8       | 8.3 a 10.6                                                                                                                                                                                                    | mg/dL   | Normal |            |
| Liberação: Norma Ohki Nakaguma (CRF 14.978)                                                                                                                                                                                                                     |           |                                                                                                                                                                                                               |         |        |            |
| <b>CLORO</b>                                                                                                                                                                                                                                                    |           |                                                                                                                                                                                                               |         |        |            |
| Método: ISE - POTENCIOMÉTRICO INDIRETO                                                                                                                                                                                                                          |           |                                                                                                                                                                                                               |         |        |            |
| Material: SORO                                                                                                                                                                                                                                                  |           |                                                                                                                                                                                                               |         |        |            |
|                                                                                                                                                                                                                                                                 | Resultado | Valor Referência                                                                                                                                                                                              | Unidade | Flag   | Delta Flag |
|                                                                                                                                                                                                                                                                 | 105       | 99 a 109                                                                                                                                                                                                      | mEq/L   | Normal |            |
| Liberação: Norma Ohki Nakaguma (CRF 14.978)                                                                                                                                                                                                                     |           |                                                                                                                                                                                                               |         |        |            |
| <b>COLESTEROL TOTAL</b>                                                                                                                                                                                                                                         |           |                                                                                                                                                                                                               |         |        |            |
| Método: ENZIMÁTICO                                                                                                                                                                                                                                              |           |                                                                                                                                                                                                               |         |        |            |
| Material: SORO                                                                                                                                                                                                                                                  |           |                                                                                                                                                                                                               |         |        |            |
|                                                                                                                                                                                                                                                                 | Resultado | Valor Referência                                                                                                                                                                                              | Unidade | Flag   | Delta Flag |
|                                                                                                                                                                                                                                                                 | 200       | Desejáveis: < 200 mg/dL<br>Limitrofes: 200 a 239 mg/dL<br>Altos: > 239 mg/dL                                                                                                                                  | mg/dL   |        |            |
| Liberação: Norma Ohki Nakaguma (CRF 14.978)                                                                                                                                                                                                                     |           |                                                                                                                                                                                                               |         |        |            |

# QUERIES RESOLVING AND SUBMISSION

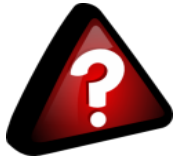

## QUERIES:

- Pending or inconsistent information
- Improper biological material
- Protocol deviation (visits)

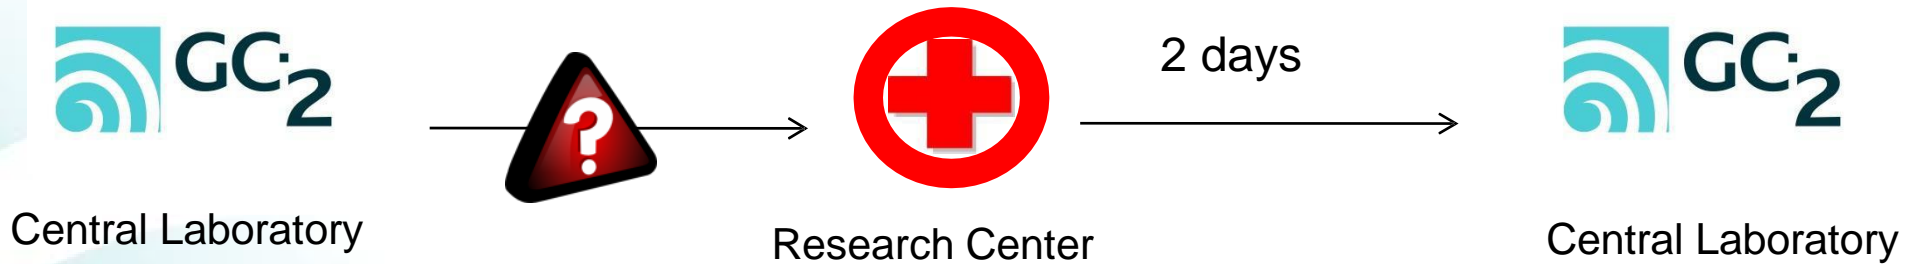

**If there is no return from the center...**

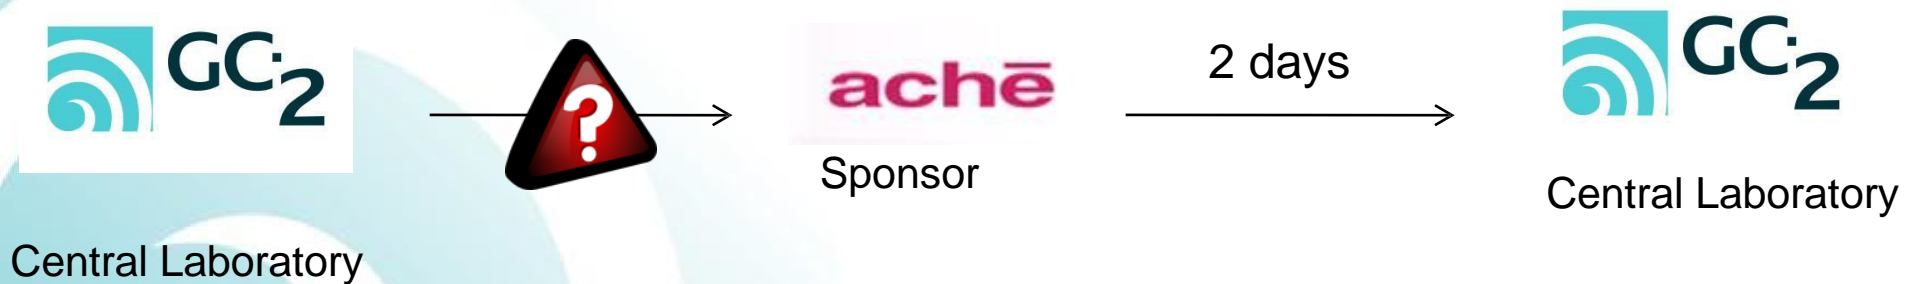

- **Requirements**

- ✓ Do not forget to send the exam requirement form with the samples
- ✓ Always complete the laboratory requirement (Lack of information or divergent information can result in laboratory queries and delays)

- **Ask your questions**

- ✓ Refer to the GC-2 Laboratory Procedures Manual or contact GC-2 (slide 02) whenever there are questions about laboratory procedures.

- **Collection**

- ✓ If a sample has not been collected, **RECORD** on the requirement form **(Additional Comments)**.

In case of doubts about:

- ✓ Interpretation of results;
- ✓ Exams correlation;
- ✓ Analysis of interings and pre-analytical variables;
- ✓ Analytical Methodologies.

The investigator may contact our medical team through the following channels:

| <b>Dr. Carlos Kiffer</b> | <b>Dr. Gustavo Campana</b> |
|--------------------------|----------------------------|
| medico@gcdois.com.br     |                            |
| Phone: (11) 3528 7406    |                            |

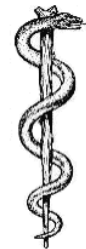

# REFERENCE VALUES STUDY LANCE

## Version 1.0 (29/Nov/2012)

| EXAM                                         | AGE (years)/ Period  | FEMALE                                                                                                                                                                            | MALE                                                                                                                                                                              | UNIT                     |
|----------------------------------------------|----------------------|-----------------------------------------------------------------------------------------------------------------------------------------------------------------------------------|-----------------------------------------------------------------------------------------------------------------------------------------------------------------------------------|--------------------------|
| Erythrocytes                                 | <b>&gt; 17 years</b> | 3.9 to 5.0                                                                                                                                                                        | 4.3 to 5.7                                                                                                                                                                        | millions/mm <sup>3</sup> |
| Hemoglobin                                   |                      | 12.0 to 15.5                                                                                                                                                                      | 13.5 to 17.5                                                                                                                                                                      | g/dL                     |
| Hematocrit                                   |                      | 35 to 45                                                                                                                                                                          | 39 to 50                                                                                                                                                                          | %                        |
| V.C.M.                                       |                      | 82 to 98                                                                                                                                                                          | 81 to 95                                                                                                                                                                          | fl                       |
| H.C.M.                                       |                      | 26 to 34                                                                                                                                                                          | 26 to 34                                                                                                                                                                          | pg                       |
| C.H.C.M.                                     |                      | 31 to 36                                                                                                                                                                          | 31 to 36                                                                                                                                                                          | g/dL                     |
| RDW                                          |                      | 11.9 to 15.5                                                                                                                                                                      | 11.9 to 15.5                                                                                                                                                                      | %                        |
| Platelets                                    |                      | 150,000 to 450,000                                                                                                                                                                | 150,000 to 450,000                                                                                                                                                                | mm <sup>3</sup>          |
| Leukocytes                                   |                      | 3,500 to 10,500                                                                                                                                                                   | 3,500 to 10,500                                                                                                                                                                   | mm <sup>3</sup>          |
| Myelocytes                                   |                      | 0                                                                                                                                                                                 | 0                                                                                                                                                                                 | mm <sup>3</sup>          |
| Metamyelocytes                               |                      | 0                                                                                                                                                                                 | 0                                                                                                                                                                                 | mm <sup>3</sup>          |
| Band Neutrophils                             |                      | no more than 840                                                                                                                                                                  | no more than 840                                                                                                                                                                  | mm <sup>3</sup>          |
| Segment. Neutrophils                         |                      | 1,700 to 8,000                                                                                                                                                                    | 1,700 to 8,000                                                                                                                                                                    | mm <sup>3</sup>          |
| Eosinophils                                  |                      | 50 to 500                                                                                                                                                                         | 50 to 500                                                                                                                                                                         | mm <sup>3</sup>          |
| Basophils                                    |                      | 0 to 100                                                                                                                                                                          | 0 to 100                                                                                                                                                                          | mm <sup>3</sup>          |
| Lymphocytes                                  |                      | 900 to 2,900                                                                                                                                                                      | 900 to 2,900                                                                                                                                                                      | mm <sup>3</sup>          |
| Monocytes                                    | 300 to 900           | 300 to 900                                                                                                                                                                        | mm <sup>3</sup>                                                                                                                                                                   |                          |
| Atypical Lymphocytes                         | 0                    | 0                                                                                                                                                                                 | /mm <sup>3</sup>                                                                                                                                                                  |                          |
| <b>Glycated Hemoglobin</b>                   | <b>0 to 18 years</b> | 4 to 6% non-diabetic patients to control Diabetes Mellitus: Pubertal range: less than or equal to 8.0%<br>Pubertal range < 8.5%<br>Final phase of puberty and young adults < 7.0% | 4 to 6% non-diabetic patients to control Diabetes Mellitus: Pubertal range: less than or equal to 8.0%<br>Pubertal range < 8.5%<br>Final phase of puberty and young adults < 7.0% | %                        |
|                                              | <b>&gt;18 years</b>  | 4 to 6%                                                                                                                                                                           | 4 to 6%                                                                                                                                                                           | %                        |
| <b>Prothrombin Activity and Time</b>         |                      | Prothrombin Time: 70 to 110%<br>Prothrombin Activity: 0.90 to 1.20                                                                                                                | Prothrombin Time: 70 to 110%<br>Prothrombin Activity: 0.90 to 1.20                                                                                                                | Seconds<br>%             |
| <b>Activated Partial Thromboplastin Time</b> |                      | Less than 42 seconds patient/control ratio: lower than 1.25                                                                                                                       | Less than 42 seconds patient/control ratio: lower than 1.25                                                                                                                       | Seconds                  |



# REFERENCE VALUES STUDY LANCE

## Version 1.0 (29/Nov/2012)

| EXAM                 | AGE (years)/ Period | BIOCHEMISTRY                                                                                                                                       |                                                                                                                                              |       |
|----------------------|---------------------|----------------------------------------------------------------------------------------------------------------------------------------------------|----------------------------------------------------------------------------------------------------------------------------------------------|-------|
|                      |                     | FEMALE                                                                                                                                             | MALE                                                                                                                                         | UNIT  |
| Sodium               |                     | 136 to 146                                                                                                                                         | 136 to 146                                                                                                                                   | mEq/L |
| Potassium            |                     | 3.5 to 5.5                                                                                                                                         | 3.5 to 5.5                                                                                                                                   | mEq/L |
| Urea                 |                     | 10 to 50                                                                                                                                           | 10 to 50                                                                                                                                     | mg/dL |
| Creatinine           | > 13 years          | 0.60 to 1.10                                                                                                                                       | 0.70 to 1.30                                                                                                                                 | mg/dL |
| Blood sugar          |                     | Normal: 70 to 99<br>Glucose intolerant: 100 to 125<br>Mellitus: Above 125 mg/dl ( in at least 2 samples collected on different days)               | Normal: 70 to 99<br>Glucose intolerant: 100 to 125<br>Mellitus: Above 125 mg/dl ( at least 2 samples collected on different days)            | mg/dL |
| SGOT (AST)           |                     | No more than 37                                                                                                                                    | No more than 39                                                                                                                              | U/L   |
| SGTP (ALT)           |                     | No more than 45                                                                                                                                    | No more than 49                                                                                                                              | U/L   |
| Total Bilirubin      |                     | No more than 1.2                                                                                                                                   | No more than 1.2                                                                                                                             | mg/dL |
| Direct               |                     | No more than 0.4                                                                                                                                   | No more than 0.4                                                                                                                             |       |
| Indirect             |                     | No more than 0.8                                                                                                                                   | No more than 0.8                                                                                                                             |       |
| Alkaline phosphatase |                     | No more than 129                                                                                                                                   | No more than 129                                                                                                                             | U/L   |
| Total Protein        |                     | 5.7 to 8.2                                                                                                                                         | 5.7 to 8.2                                                                                                                                   | g/dL  |
| Globulin             |                     | 1.7 to 3.5                                                                                                                                         | 1.7 to 3.5                                                                                                                                   | g/dL  |
| Albumin              |                     | 3.2 to 4.8                                                                                                                                         | 3.2 to 4.8                                                                                                                                   | g/dL  |
| A/G Ratio            |                     | 0.9 to 2.0                                                                                                                                         | 0.9 to 2.0                                                                                                                                   | NA    |
| CPK                  |                     | 33 to 211                                                                                                                                          | 33 to 211                                                                                                                                    | U/L   |
| CK-MB                |                     | < 25                                                                                                                                               | < 25                                                                                                                                         | U/L   |
| C Reactive Protein   |                     | inflammatory diseases in the acute phase:<br>> 10.0<br>For coronary risk assessment:<br>low risk: <1.00<br>mild: 1.00 to 3.00<br>high risk: > 3.00 | inflammatory diseases:<br>acute phase: > 10.0<br>For coronary risk assessment:<br>low risk: <1.00<br>mild: 1.00 to 3.00<br>high risk: > 3.00 | mg/L  |
| Apolipoprotein B     |                     | 51 to 171                                                                                                                                          | 56 to 162                                                                                                                                    | mg/dL |
| Total Cholesterol    |                     | Desirable: < 200<br>Limit: 200 to 239<br>High: > 239                                                                                               | Desirable: < 200<br>Limit: 200 to 239<br>High: > 239                                                                                         | mg/dL |
| HDL                  |                     | ≥ 40                                                                                                                                               | ≥ 40                                                                                                                                         | mg/dL |
| VLDL                 |                     | Less than 30                                                                                                                                       | Less than 30                                                                                                                                 | mg/dL |
| LDL                  |                     | Desirable: < 100<br>Borderline: 100 to 129<br>High borderline: 130 to 159<br>High: 160 to 189<br>Very high: > 189                                  | Desirable: < 100<br>Borderline: 100 to 129<br>High borderline: 130 to 159<br>High: 160 to 189<br>Very high: > 189                            | mg/dL |
| Triglycerides        |                     | Desirable: < 150<br>Borderline: 150 to 199<br>High: 200 to 499<br>Very high: > 500                                                                 | Desirable: < 150<br>Borderline: 150 to 199<br>High: 200 to 499<br>Very high: > 500                                                           | mg/dL |

# REFERENCE VALUES STUDY LANCE

## Version 1.0 (29/Nov/2012)

| HORMONE                                                                                                                                                                                                                                                                                                                                                          |                     |                                                                                                                                                                                                                                             |                                                                                                                                                                                                        |                               |
|------------------------------------------------------------------------------------------------------------------------------------------------------------------------------------------------------------------------------------------------------------------------------------------------------------------------------------------------------------------|---------------------|---------------------------------------------------------------------------------------------------------------------------------------------------------------------------------------------------------------------------------------------|--------------------------------------------------------------------------------------------------------------------------------------------------------------------------------------------------------|-------------------------------|
| EXAM                                                                                                                                                                                                                                                                                                                                                             | AGE (years)/ Period | FEMALE                                                                                                                                                                                                                                      | MALE                                                                                                                                                                                                   | UNIT                          |
| TSH                                                                                                                                                                                                                                                                                                                                                              | 12 to 20 years      | 0.510 to 4.300                                                                                                                                                                                                                              | 0.510 to 4.300                                                                                                                                                                                         | uUI/mL                        |
|                                                                                                                                                                                                                                                                                                                                                                  | 21 to 120 years     | 0.270 to 4.200                                                                                                                                                                                                                              | 0.270 to 4.200                                                                                                                                                                                         | uUI/mL                        |
| B-HCG                                                                                                                                                                                                                                                                                                                                                            |                     | <p>&lt; 2: Correlate with the absence of pregnancy<br/>From 2 to 25: They are doubtful and suggest repetition after one week.<br/>&gt; 25: Correlate, usually with pregnancy<br/>Menopause (over 40 years):<br/>Less than or equal to 7</p> | NA                                                                                                                                                                                                     | mUI/mL                        |
| URINE                                                                                                                                                                                                                                                                                                                                                            |                     |                                                                                                                                                                                                                                             |                                                                                                                                                                                                        |                               |
| EXAM                                                                                                                                                                                                                                                                                                                                                             | AGE (years)/ Period | FEMALE                                                                                                                                                                                                                                      | MALE                                                                                                                                                                                                   | UNIT                          |
| <b>Type 1 Urine</b><br><br><b>COLOR</b><br><b>Ph</b><br><br><b>DENSITY</b><br><br><b>Abnormal Elements</b><br><br><b>Proteins</b><br><b>Glucose</b><br><b>Ketone Bodies</b><br><b>Bilirubin</b><br><b>Urobilinogen</b><br><br><b>Quantitative Sediment Exam</b><br><br><b>Red Blood Cells</b><br><b>White Blood Cells</b><br><b>Cylinders</b><br><b>Crystals</b> |                     | <p>0.5 to 8.0<br/>1.010 to 1.030</p> <p>Negative<br/>Negative<br/>Negative<br/>Negative</p> <p>&gt; or = at 2.0 mg/dL</p> <p>no more than 10000/ml<br/>no more than 20000/ml<br/>absent<br/>absent</p>                                      | <p>0.5 to 8.0<br/>1.010 to 1.030</p> <p>Negative<br/>Negative<br/>Negative<br/>Negative</p> <p>&gt; or = at 2.0 mg/dL</p> <p>no more than 10000/ml<br/>no more than 20000/ml<br/>absent<br/>absent</p> | <p>mg/dL</p> <p>mL<br/>mL</p> |

# SCHEDULE OF HOLIDAYS FOR SAMPLING

GC-2 Courier, Laboratory and Monitoring services **will not work** during national holidays and bridges, mentioned in the table below.

✓ The Center should not schedule patients for the dates mentioned.

✓ On the day before the holiday, try to schedule the collection at a time that ensures that the sample arrives at the laboratory during business hours.

✓ The research centers will be re-alerted by GC-2 about the proximity of the referred holidays.

| HOLIDAY                                      | 2013                                      | 2014                                                |
|----------------------------------------------|-------------------------------------------|-----------------------------------------------------|
| <b>New Year</b>                              | January 01 (Tue)<br>December 31 (Day off) | January 01 (Wed)                                    |
| <b>Anniversary of São Paulo</b>              | January 25 (Wed)                          | January 25 (Sat)                                    |
| <b>Carnaval</b>                              | February 11 and 12<br>(Mon/Tue)           | March 03 and 04 (Mon/Tue)                           |
| <b>Easter</b>                                | March 29 (Fri)                            | April 18 (Fri)                                      |
| <b>Tiradentes</b>                            | April 21 (Sun)                            | April 21 (Mon)                                      |
| <b>Labor Day</b>                             | May 01 (Wed)                              | May 01 (Thu)                                        |
| <b>Corpus Christi</b>                        | May 30 (Thu) May 31 (Day<br>off - Fri)    | June 19 (Thu) June 20 (Day<br>off - Fri)            |
| <b>Constituição de 1932</b>                  | July 09 (Tue)<br>Day off 8 (Mon)          | July 09 (Wed)                                       |
| <b>Brazil's Independence Day</b>             | September 07 (Sat)                        | September 07 (Sun)                                  |
| <b>Nossa Sra. Aparecida</b>                  | October 12 (Sat)                          | October 12 (Sun)                                    |
| <b>All Souls' Day</b>                        | November 02 (Sat)                         | November 02 (Sun)                                   |
| <b>Brazil's Proclamation of the Republic</b> | November 15 (Fri)                         | November 15 (Sat)                                   |
| <b>Black Awareness Day</b>                   | November 20 (Wed)                         | November 20 (Thu)<br>November 21 (Day off –<br>Sex) |
| <b>Christmas</b>                             | December 25 (Wed)                         | December 25 (Thu)                                   |
